# Supplementary material for: Remote Monitoring for Seizures During Therapeutic Hypothermia in Neonates With Hypoxic-Ischemic Encephalopathy
Source: PubMed Central journal article supplement (PMC10652158; doi:10.1001/jamanetworkopen.2023.43429), 2023-11-15
Supplement: jamanetwopen-e2343429-s002.pdf [file jamanetwopen-e2343429-s002.pdf]

## Data Sharing Statement

Variante. Remote Monitoring for Seizures During Therapeutic Hypothermia in Neonates With Hypoxic-Ischemic Encephalopathy. *JAMA Netw Open*. Published November 16, 2023. doi:10.1001/jamanetworkopen.2023.43429

### Data

**Data available:** No

### Additional Information

**Explanation for why data not available:** Unidentified study data may be shared upon request.
